# Supplementary material for: Colorimetric sensor arrays for antioxidant recognition based on Co3O4 dual-enzyme activities
Source: Royal Society of Chemistry journal article supplement (doi:10.1039/d3an00939d), 2023-01-01
Supplement: d3an00939d1.pdf [file d3an00939d1.pdf]

## Supporting Information

### **Colorimetric Sensor Array for Antioxidant Recognition based on Co<sub>3</sub>O<sub>4</sub> Dual Enzyme Activity**

**Pingping Hao<sup>a</sup>, Zhenchao Liu<sup>a</sup>, Zhiwei Wang<sup>a</sup>, Min Xie<sup>b,\*</sup> and Qingyun Liu<sup>a,\*</sup>**

*<sup>a</sup> College of Chemical and Biological Engineering, Shandong University of Science and Technology, Qingdao 266590, P R China*

*<sup>b</sup> Community Health Service Center (University Hospital), University of Science and Technology Beijing, Beijing 100083, P. R. China*

---

**\* Corresponding Author**

E-mail: min66@ustb.edu.cn; qyliu@sdust.edu.cn

Tel: +86 0532 86057757

## Preparation

A solution containing cobalt nitrate hexahydrate ( $\text{Co}(\text{NO}_3)_2 \cdot 6\text{H}_2\text{O}$ , 2.0 mmol), glycerol (16 mL) and isopropanol (60 mL) was placed in a Teflon-lined stainless-steel autoclave. The autoclave was then treated at 180 °C for 6 h. After cooling to room temperature naturally, the solution was centrifuged to recover the solid precipitate, which was washed several times with ethanol and dried in an oven at 80 °C to afford the precursor of Co.

A mixture containing the precursor (0.1 g) and deionized water (20 mL) was placed in a Teflon-lined stainless steel autoclave, and then treated at 160 °C for 3 h. After cooling to room temperature naturally, the solution was centrifuged to recover the solid precipitate. The finally obtained solid product is denoted as h-CoOH. The  $\text{Co}_3\text{O}_4$  samples were prepared by calcining h-CoOH in air at 400 °C for 2 h, respectively.

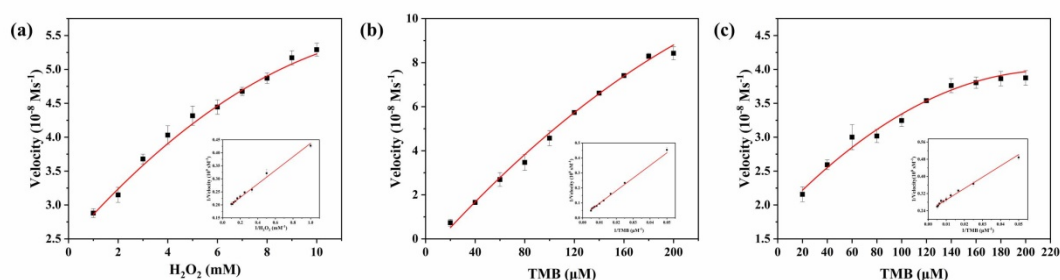

**Fig. S1** Kinetic analysis of the as-prepared  $\text{Co}_3\text{O}_4$  by the Michaelis–Menten model and double reciprocal plots, respectively.

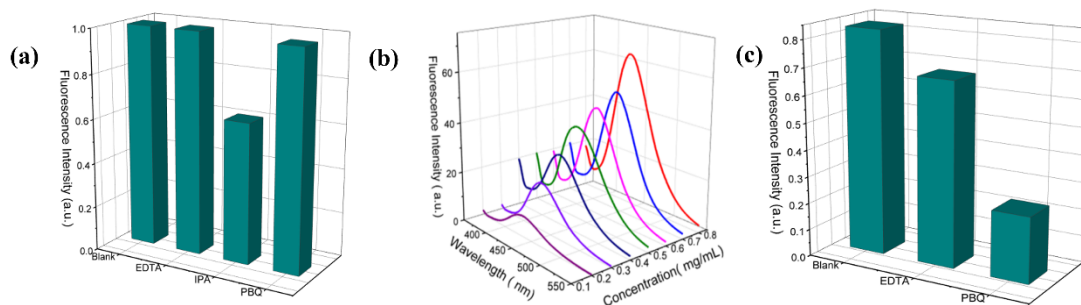

**Fig. S2** (a), (c) Effects of various active scavengers during the catalysis of TMB with the aid of  $\text{Co}_3\text{O}_4$  and (b) Fluorescence intensity varies with the concentration of  $\text{Co}_3\text{O}_4$  at different wavelengths.

**Table S1** Comparison of peroxidase-like and oxidase-like kinetic parameters.

| Catalyst                            | $K_m$ (mM)             |       | $V_{max}$ ( $10^{-8}$ Ms $^{-1}$ ) |       | Ref.             |
|-------------------------------------|------------------------|-------|------------------------------------|-------|------------------|
|                                     | $\text{H}_2\text{O}_2$ | TMB   | $\text{H}_2\text{O}_2$             | TMB   |                  |
| HRP                                 | 3.7                    | 0.434 | 8.71                               | 10    | 1                |
| $\text{CeO}_2/\text{C}$             | 2.61                   | 0.12  | 3.31                               | 2.08  | 2                |
| $\text{CoFe-LDH}/\text{CeO}_2$      | 10.82                  | 0.419 | \                                  | \     | 3                |
| $\text{CeO}_2$ NPs(OXD)             | \                      | 0.80  | \                                  | 30.00 | 4                |
| $\text{Co}_3\text{O}_4(\text{POD})$ | 1.3                    | 0.221 | 5.62                               | 71.22 | <b>This work</b> |
| $\text{Co}_3\text{O}_4(\text{OXD})$ | \                      | 0.598 | \                                  | 4.199 | <b>This work</b> |

**Table S2** Other methods used to detect DA.

| <b>Linear range</b>  | <b>LOD</b>         | <b>Method</b>                    | <b>Ref.</b>      |
|----------------------|--------------------|----------------------------------|------------------|
| 1-200 $\mu\text{M}$  | 0.07 $\mu\text{M}$ | Fluorescence                     | 5                |
| 0.5-25 $\mu\text{M}$ | 0.18 $\mu\text{M}$ | Electrochemical                  | 6                |
| <b>0-1000 nM</b>     | <b>8.26 nM</b>     | <b>Colorimetric sensor array</b> | <b>This work</b> |

**Table S3** Other methods used to detect AA.

| <b>Linear range</b>  | <b>LOD</b>          | <b>Method</b>                    | <b>Ref.</b>      |
|----------------------|---------------------|----------------------------------|------------------|
| 0-80 $\mu\text{M}$   | 0.026 $\mu\text{M}$ | Colorimetric                     | 7                |
| 10-250 $\mu\text{M}$ | 1.3 $\mu\text{M}$   | Fluorescence                     | 8                |
| <b>0-1000 nM</b>     | <b>5.42 nM</b>      | <b>Colorimetric sensor array</b> | <b>This work</b> |

**Table S4** Other methods used to detect GSH.

| <b>Linear range</b>    | <b>LOD</b>          | <b>Method</b>                    | <b>Ref.</b>      |
|------------------------|---------------------|----------------------------------|------------------|
| 1-10 $\mu\text{M}$     | 0.658 $\mu\text{M}$ | Colorimetric                     | 9                |
| 12.5-800 $\mu\text{M}$ | 0.7 $\mu\text{M}$   | Fluorescence                     | 10               |
| <b>0-1000 nM</b>       | <b>2.89 nM</b>      | <b>Colorimetric sensor array</b> | <b>This work</b> |

**Table S5** Other methods used to detect Cys.

| <b>Linear range</b>      | <b>LOD</b>     | <b>Method</b>                    | <b>Ref.</b>      |
|--------------------------|----------------|----------------------------------|------------------|
| 0-140 $\mu\text{M}$      | 11.1 nM        | Fluorescence                     | 11               |
| 0.05 -14.0 $\mu\text{M}$ | 20 nM          | Colorimetric                     | 12               |
| <b>0-1000 nM</b>         | <b>6.24 nM</b> | <b>Colorimetric sensor array</b> | <b>This work</b> |

## References

1. L. Gao, J. Zhuang, L. Nie, J. Zhang, Y. Zhang, N. Gu, T. Wang, J. Feng, D. Yang, S. Perrett and X. Yan, *Nature Nanotechnology*, 2007, **2**, 577-583.
2. W. Dong and Y. Huang, *Microchimica Acta*, 2020, **187**.
3. W. Yang, J. Li, J. Yang, Y. Liu, Z. Xu, X. Sun, F. Wang and D. H. L. Ng, *Journal of Alloys and Compounds*, 2020, **815**.
4. X. Hu, A. Saran, S. Hou, T. Wen, Y. Ji, W. Liu, H. Zhang, W. He, J.-J. Yin and X. Wu, *RSC Advances*, 2013, **3**.
5. X. Chen, N. zheng, S. Chen and Q. Ma, *Analytical Methods*, 2017, **9**, 2246-2251.
6. S. Zhang, T.-T. Feng, L. Zhang and M.-N. Zhang, *Chinese Journal of Analytical Chemistry*, 2019, **47**, 1664-1670.
7. H. Tan and Z. Nan, *Materials Letters*, 2022, **320**.
8. J. Zhu, Z.-J. Zhao, J.-J. Li and J.-W. Zhao, *Journal of Luminescence*, 2017, **192**, 47-55.
9. X. Chen, S. Han, N. Li, J. Lian, Y. Zhang, Q. Liu, X. Zhang and X. Zhang, *Talanta*, 2020, **218**, 121142.
10. R. Jia, K. Jin, J. Zhang, X. Zheng, S. Wang and J. Zhang, *Sensors and Actuators B: Chemical*, 2020, **321**.
11. X. Song, Y. Yang, J. Ru, Y. Wang, F. Qiu, Y. Feng, G. Zhang and W. Liu, *Talanta*, 2019, **204**, 561-568.
12. Z. Huang, Y. Yang, Y. Long and H. Zheng, *Analytical Methods*, 2018, **10**, 2676-2680.
